# Supplementary material
Source: publisher figshare collection journal article supplement (https://karger.figshare.com/articles/dataset/_/5121253)
Supplement: Supplementary file 1 [file 1]

Archive with 5 entries (5 files):
- 000316540_sm_Figure S1.gif
- 000316540_sm_Figure S1.tif
- 000316540_sm_Figure S2.gif
- 000316540_sm_Figure S2.tif
- 000316540_sm_Suppl.Material.pdf
