# Supplementary material
Source: publisher figshare collection journal article supplement (https://karger.figshare.com/articles/dataset/_/5121253)

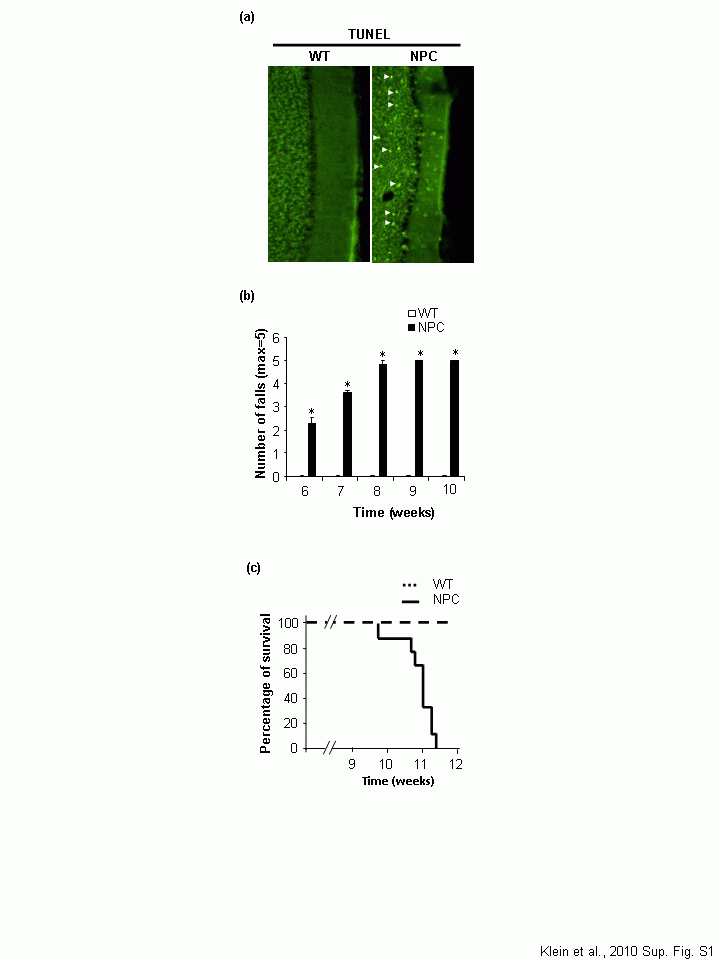

Supplement: Supplementary file 1 [file 1 › 000316540_sm_Figure S1.gif]

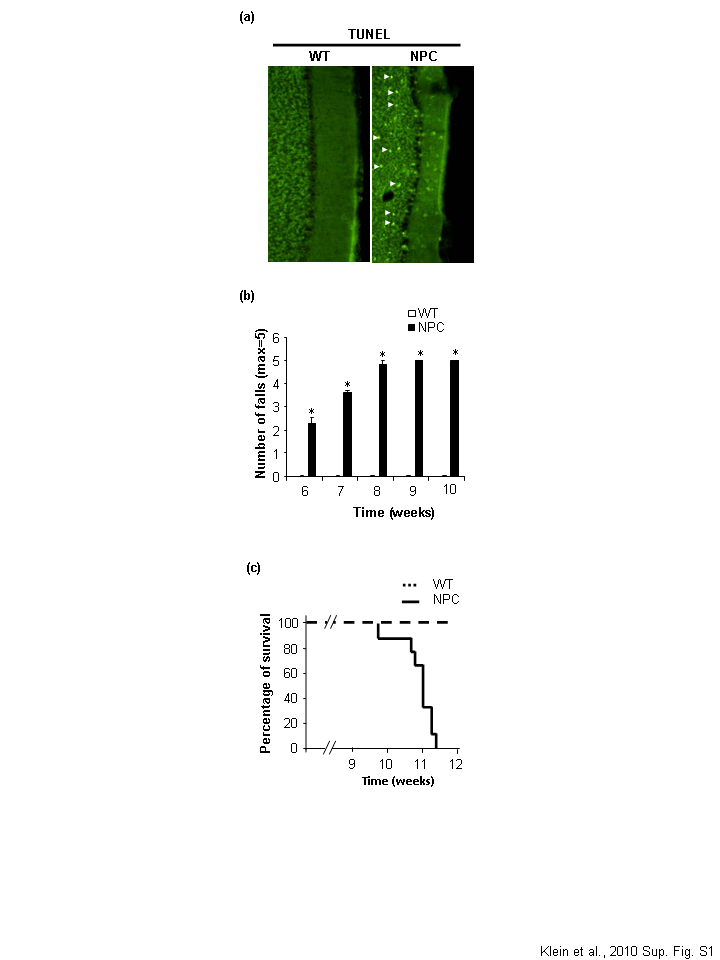

Supplement: Supplementary file 1 [file 1 › 000316540_sm_Figure S1.tif]

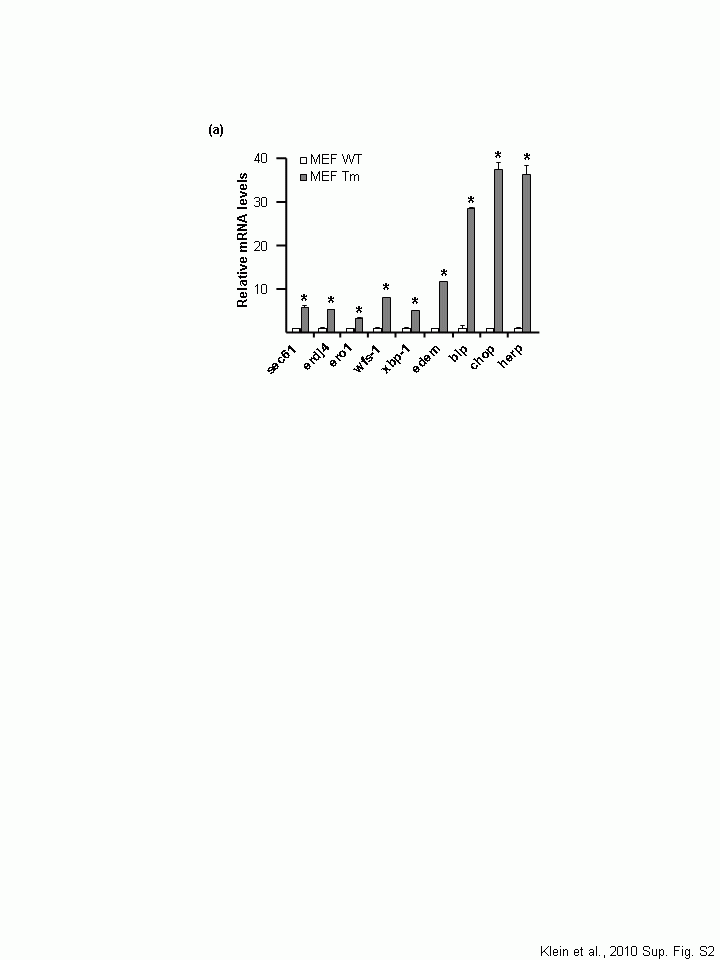

Supplement: Supplementary file 1 [file 1 › 000316540_sm_Figure S2.gif]

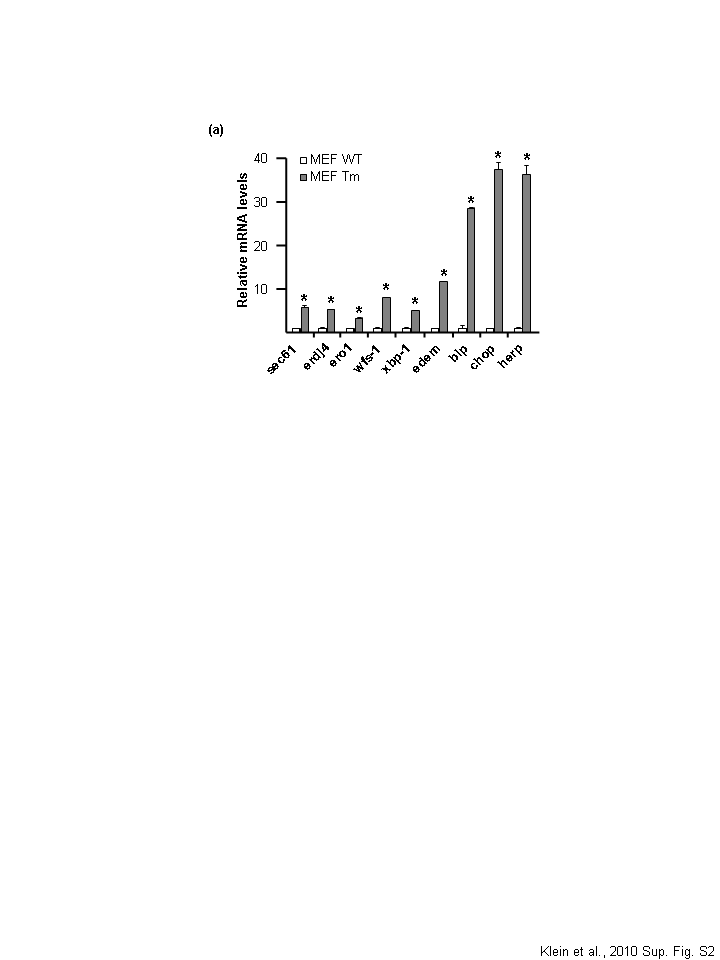

Supplement: Supplementary file 1 [file 1 › 000316540_sm_Figure S2.tif]
